# *Drosophila* syntaxin 16 is a Q-SNARE implicated in Golgi dynamics

Hao Xu<sup>1,3</sup>, Gabrielle L. Boulianne<sup>2,4</sup> and William S. Trimble<sup>1,3,\*</sup>

Programmes in <sup>1</sup>Cell Biology and <sup>2</sup>Developmental Biology, The Hospital for Sick Children, University of Toronto, 555 University Avenue, Toronto, Ontario M5G 1X8 Canada

Departments of <sup>3</sup>Biochemistry and <sup>4</sup>Molecular and Medical Genetics, University of Toronto, 555 University Avenue, Toronto, Ontario M5G 1X8 Canada

\*Author for correspondence (e-mail: wtrimble@sickkids.on.ca)

Accepted 3 September 2002

Journal of Cell Science 115, 4447-4455 © 2002 The Company of Biologists Ltd  
doi:10.1242/jcs.00139

## Summary

SNARE isoforms appear to regulate specific intracellular membrane trafficking steps. To identify new SNARE proteins in *Drosophila melanogaster* we used a yeast two-hybrid screen to search for proteins that interact with SNAP. Here we report the identification of the *Drosophila* homologue of syntaxin 16. dsyntaxin 16 binds SNAP in a concentration-dependent fashion and genetically interacts with NSF2. Like its mammalian homologue, dsyntaxin 16 is ubiquitously expressed and appears to be localized to the

Golgi apparatus. In addition, membranes containing dsyntaxin 16 become aggregated upon Brefeldin A treatment and are dispersed during meiosis. Inhibition of dsyntaxin 16 function by overexpression of truncated forms in cultured Schneider cells indicates that dsyntaxin 16 may selectively regulate Golgi dynamics.

Key words: Golgi, SNARE, Syntaxin, Membrane fusion, *Drosophila*

## Introduction

Vesicular trafficking between different membrane compartments in eukaryotic cells is essential for cell survival and function. To ensure precise membrane transport, elegant mechanisms have evolved to sort cargoes into the proper vesicles (reviewed by Bannykh et al., 1998; Pelham, 1999; Rothman and Wieland, 1996), which are then delivered to the target compartment (Bloom and Goldstein, 1998). Upon reaching their destination, vesicles will fuse to the target membrane, a process that requires the coordination of at least a dozen molecules, among which the SNAREs (SNAP receptors) are considered to assemble the core of the fusion machinery.

Originally identified as membrane-associated proteins essential for the presynaptic release of neurotransmitters, SNAREs comprise syntaxin, SNAP-25 and VAMP/synaptobrevin, each belonging to a protein family with increasing family members (reviewed by Chen and Scheller, 2001; Jahn and Sudhof, 1999; Rothman, 1994). Vesicle SNAREs can interact with cognate SNAREs on the target membrane. In the case of synaptic fusion, syntaxin 1 (on plasma membranes) and VAMP/synaptobrevin 2 (on synaptic vesicles) each contributes one helix, whereas SNAP-25 (on plasma membranes) contributes two helices to form a four-helix bundle. Lying in the core of the bundle are conserved layers of interacting amino-acid side chains, with the central layer being the most highly conserved (Sutton et al., 1998). Thus, on the basis of whether they provide a glutamine or arginine at the central layer, SNAREs can be classified as either Q- or R-SNAREs. Additional structural analysis suggests that a functional SNARE complex is most probably formed by

coiled-coil interactions among three Q-SNAREs and one R-SNARE that are distributed on apposing membranes (Antonin et al., 2002; Fasshauer et al., 1998). Such complexes may be stable enough to survive mild SDS treatment and their disassembly requires the collaborative actions of the ATPase NSF (N-ethyl-maleimide-sensitive factor) and its ligand SNAP (soluble NSF associated protein) (Otto et al., 1997). These observations, together with the fact that the coiled-coil terminates at the C-terminal transmembrane domain of the SNAREs, have led to the hypothesis that the formation of the SNARE complex releases sufficient energy to bring the opposing membranes into close apposition and thereby promote fusion (Hughson, 1999). Strong support for this hypothesis comes from the observation that cognate Q- and R-SNAREs reconstituted separately on artificial liposomes were sufficient to mediate membrane fusion (Fukuda et al., 2000; Weber et al., 1998). However, recent evidence from a number of different systems has suggested that SNARE complex formation may not constitute the final step of membrane fusion (reviewed by Mayer, 1999; Mayer, 2001). At least in the case of yeast vacuolar fusion, additional proteins have been shown to act after SNARE complex formation (Peters et al., 1999; Peters and Mayer, 1998).

In spite of the debate on the exact role of SNAREs in the final stages of fusion, it has been generally accepted that the interaction of cognate SNAREs at least contributes to the specificity of membrane fusion and that most trafficking events require a different SNARE complex (Pelham, 2001; Rothman and Warren, 1994). This may explain why there are so many members of the SNARE super-family, with rather unique but sometimes overlapping distribution patterns along the

secretory and endocytic pathways. Unfortunately, studies on many individual mammalian SNAREs have yet to provide conclusive evidence for the functional pairing of cognate SNAREs. This is largely due to two reasons: the non-specific pairing of SNAREs under *in vitro* conditions (Tsui and Banfield, 2000; Yang et al., 1999) and the difficulty in generating mutant alleles in live animals or cultured tissues to address the issue *in vivo*. *Drosophila melanogaster*, by contrast, allows great flexibility in genetic manipulation while offering a similar level of complexity to mammals.

In an attempt to initiate studies on SNARE-mediated membrane trafficking in *Drosophila*, we screened a fly cDNA library for potential SNAREs using the yeast two-hybrid system. Using this approach, a novel syntaxin isoform that shows significant amino-acid sequence similarity to mammalian syntaxin 16 was identified. dSyx16 is ubiquitously expressed in *Drosophila* and appears to localize to the Golgi apparatus. Overexpression studies indicate that dSyx16 may selectively regulate Golgi dynamics in the fruitfly.

## Materials and Methods

### Yeast two-hybrid screen

A cDNA of *Drosophila* SNAP was generated by RT-PCR (see section 2.2) and confirmed by DNA sequencing. The cDNA was subcloned into the yeast two-hybrid vector pAS2 (Clontech), downstream of the GAL4 DNA-binding motif. The resulting construct was transformed into the yeast strain Y190 (Clontech), and the expression of the chimeric protein (or the bait) was examined by western blot analysis.

To screen for potential binding partners of dSNAP, a *Drosophila melanogaster* ovary cDNA library (gift of J. Verdi, University of Western Ontario) constructed downstream of the GAL4 activating motif in the pACT2 vector was used to transform the Y190 strain that expressed the bait. Transformants were plated on His<sup>-</sup> agar plates from which potential positive clones were selected by monitoring the expression of the *His3* reporter gene. For further confirmation, transformants with a His<sup>+</sup> phenotype were tested for expression of a second reporter gene, *lacZ*, using a filter assay for  $\beta$ -galactosidase activity as recommended (Clontech). To eliminate false positives, candidate transformants were grown in medium with no selection for the bait vector. The transformants that lost the bait were tested again for the lack of *lacZ* expression.

Plasmid DNA was isolated from yeast, transformed into *E. coli* and then purified from *E. coli* for DNA sequencing.

### Molecular biology

*Drosophila* SNAP was cloned by RT-PCR. Total RNA from *Oregon R* was isolated using Trizol reagent (Gibco). The first round of cDNA synthesis was achieved with AMV reverse transcriptase (Promega) using oligo(dT) as a primer. A subsequent PCR reaction was carried out using primers: 5'-CATATGGGTGACAACGAACAGAAGGC and 5'-GTGACTCGCAGATCGGGATCCTCG. The PCR product was subcloned into the pBluescript SK<sup>+</sup> vector (Stratagen) for sequencing.

The partial cDNA of *dSyx16*, cloned via the yeast two-hybrid screen, was amplified by PCR using primers: 5'-GAATTCATATGTC-TAAGATCAAGCCTAAGCTGG and 5'-CTCGAGCTACTTGCG-GTTCTTGCGCTG, or 5'-AGATCTCGAGCTAGAGCTTGGTCAG-GATG to generate *dSyx16*<sup>70 to 329</sup> or *dSyx16*<sup>70 to 352</sup> respectively. Each PCR product was subcloned into pBluescript SK<sup>+</sup> vector for sequencing. *dSyx16*<sup>70 to 329</sup> was then subcloned into pGEX-KG vector (Pharmacia) to generate GST-*dSyx16*<sup>70 to 329</sup> for binding assays or into pQE-30 vector (Qiagen) to generate His-*dSyx16*<sup>70 to 329</sup> for antibody production or into pUAST (Brand and Perrimon, 1993) for microin-

jection. *dSyx16*<sup>70 to 352</sup> was subcloned into pUAST and pRmHa-3-myc (see below) for microinjection and transient transfection of cultured cells.

pRmHa-3-myc was constructed by replacing the polycloning site of pRmHa-3 (gift of D. Williams) with the polycloning site of pcDNA3.1-myc, which has a myc epitope at the 5' end. Full-length *dSyx16* or the cytoplasmic domain of *dSyx16* (*dSyx16*<sup>70 to 329</sup>) was coupled downstream from the myc-tag in this vector.

Chromosomal mapping of *dSyx16* was conducted by blotting the P1 *Drosophila* high-density filter (Genome system) with [<sup>32</sup>P]-labelled *dSyx16* cDNA. The position of the positive signal was matched with the chromosomal location, according to instructions provided by the manufacturer. The location of *dSyx16* was subsequently confirmed by data from the Berkeley *Drosophila* Genome Project (<http://flybase.bio.indiana.edu/bin/fbgrmap?fbgene19&id=FBgn0031106>).

### Binding assays and western blot analysis

BSJ72 expressing GST-*dSyx16*<sup>70 to 329</sup> fusion protein were lysed using a French press (Sim-Aminco). Fusion protein in the inclusion body was dissolved with 1% N-lauryl sarcosine in PBS and subsequently treated with 2% Triton X-100 for 1 hour at 4°C before it was coupled onto glutathione agarose beads (Sigma). Approximately 200 ng of immobilized GST-*dSyx16*<sup>70 to 329</sup> or GST (negative control) were then incubated with specific amounts of recombinant dSNAP (Mohtashami et al., 2001) in binding buffer (1×PBS, 0.05% Tween 20, 5 mM EDTA, 100 mM NaCl, and 0.1% BSA) for 1 hour at 4°C. Following extensive washes with 50 mM HEPES (pH 7.5), 5 mM EDTA, 150 mM NaCl and 0.5% Triton X-100, proteins on the agarose beads were extracted with 2×SDS sample buffer and subjected to SDS-PAGE. Western blot analysis was performed with Anti-GST (1:1000) (K. Ross and W.S.T., unpublished) and anti-dSNAP [1:2000 (Mohtashami et al., 2001)].

*Oregon R* embryos at different developmental stages, third instar larvae, pupae, adults, adult heads, bodies, salivary glands and other imaginal discs dissected from third instar larvae were lysed in homogenization buffer (100 mM Tris, pH 6.8, 20% glycerol, 2% SDS and 5 mM EDTA). Following protein quantification with BCA reagents (Pierce), equal amounts of protein were subjected to 10% SDS-PAGE and western blot analysis using affinity-purified anti-*dSyx16* antibody (1:800) that was raised against His-*dSyx16*<sup>70 to 329</sup>.

In fractionation studies, *Oregon R* adults were homogenized in 50 mM HEPES (pH 7.5), 25% sucrose, 200  $\mu$ M PMSF and 5 mM EDTA. Following centrifugation for 10 minutes at 1200 g, the supernatant was centrifuged at 100,000 g for 1 hour to separate the soluble fraction and the membrane fraction. The membrane pellet was re-suspended and incubated with either H<sub>2</sub>O, 2 M KCl, 0.2 M Na<sub>2</sub>CO<sub>3</sub> (pH 11-12), 4M urea, 2% Triton X-100 or 2% SDS for 1 hour at 4°C. After centrifugation, both the soluble and insoluble fractions were subjected to SDS-PAGE and western blot analysis.

### Immunocytochemistry and transient expression in cultured cells

Schneider cells (S2 cells) were grown on coverslips in Schneider's *Drosophila* medium (Gibco) supplemented with 10% FBS overnight before they were treated with 1.5% DMSO alone (negative control) or 30  $\mu$ g/ml of brefeldin A (Sigma) and 1.5% DMSO for 2 hours. Cells were then fixed with 4% paraformaldehyde in 100 mM Na<sub>3</sub>PO<sub>4</sub> (pH 7.0) for 25 minutes. After incubation with quench buffer (25 mM NH<sub>4</sub>Cl, 25 mM glycine, 1×PBS) for 15 minutes, cells were then blocked overnight at 4°C with 2% BSA, 2% normal goat serum in PBT (PBS with 0.1% Triton X-100). Cells were then incubated for 2 hours with rabbit anti-*dSyx16* and mouse monoclonal anti-p120 (1:500; Calbiochem). Following washes with PBT, cells were incubated with Alexa-488-conjugated goat anti-rabbit (1:1000; Molecular Probes) and Cy3-conjugated donkey anti-mouse (1:1000;

Molecular Probes) for 1 hour, washed with PBT and then mounted and cleared with DAKO fluorescent mounting medium.

For transient expression, S2 cells on the coverslip were transiently transfected overnight using the Ca<sub>3</sub>(PO<sub>4</sub>)<sub>2</sub> method with various pRmHa-3-myc-*dSyx16* constructs, washed with PBS and re-incubated overnight in 1 mM CuSO<sub>4</sub> in Schneider's *Drosophila* medium supplemented with 10% FBS medium. The cells were then fixed and co-stained with Rabbit anti-myc (1:100; Molecular Probes) and mouse monoclonal anti-P120, which recognizes a 120 kDa Golgi protein (Stanley et al., 1997).

To examine Golgi morphology, salivary glands of *Oregon R* were dissected from third instar larva, fixed in 4% paraformaldehyde and stained with anti-dSyx16 (1:400). Testes were prepared and immunostained as described previously (Hime et al., 1996). To visualize DNA, propidium iodide (5 µg/ml) was used during the secondary incubation. Images of salivary glands, S2 cells and testes were captured by a Zeiss LSM510 confocal microscope.

Fly stocks and genetic studies

Stocks were maintained at room temperature on standard cornmeal agar medium unless otherwise indicated. Visible markers and balancer chromosomes have been previously described (Lindsley, 1992). Transgenic flies UAS-*dSyx16*<sup>70 to 329</sup> and UAS-*dSyx16*<sup>70 to 352</sup> were made by standard P-element-mediated transformation (Rubin and Spradling, 1982). Individual transgenic lines were crossed with *C96-GAL4*, *UAS-dNSF2/TM3*, *Ser* at room temperature. Adult wings were dissected and placed on glass slides in a drop of isopropanol and then mounted in a mixture of Canada balsam and methylsalicylate (Sigma). Images were obtained with a Nikon Optiphot 2 microscope and CCD camera.

Results and Discussion

Cloning and sequence analysis of *Drosophila* syntaxin 16

SNAREs serve as receptors for SNAP. We therefore decided to search for novel *Drosophila* SNAREs using a yeast two-hybrid screen with *Drosophila* SNAP as bait. The cDNA of *dSNAP* was obtained by RT-PCR, inserted downstream of the GAL4 DNA-binding motif in the bait vector, and then used to screen a *Drosophila* ovary cDNA library. Since active membrane fusion events (e.g. cellularization) that take place at early stages of embryogenesis require numerous molecules maternally deposited during oogenesis, we expected that the ovary cDNA library would be an excellent pool for SNAREs. Indeed, after screening approximately 2 million clones, we identified, in addition to two known syntaxins (*dSyx1* and *dSyx5*), one novel syntaxin family member. This clone (#396) showed significant sequence similarity to mammalian syntaxin 16 and was thought to carry the full-length cDNA of *Drosophila* syntaxin 16 at the time. By probing a P1 *Drosophila* high-density filter, we mapped the gene to 19E2-3 on the X chromosome. The subsequent completion of the *Drosophila* genome project (Adams et al., 2000) precisely located the gene to be at 19D1-2. The completion of the *Drosophila* genome project also allowed us to examine the

genomic sequence of *dSyx16* (GenBank Acc. # NT033768) and full-length cDNAs (GenBank Acc. # AI113714 and NM078696), all of which predict an additional 69 amino acids at the N-terminus of our original clone. The full-length *dSyx16* cDNA thereby encodes 352 amino acids (Fig. 1).

Like human syntaxin 16, *Drosophila* syntaxin 16 carries at the C-terminus a 21 amino-acid-long hydrophobic motif, which probably serves as a transmembrane domain that anchors the protein to the membrane. Adjacent to the C-terminal hydrophobic motif is a predicted helical domain of about 60 amino acids with the potential to form a coiled-coil structure (Fig. 1). This motif is conserved within the syntaxin family (Weimbs et al., 1997) and apparently mediates the interaction of syntaxin with many of its binding partners (i.e., SNAP, VAMP, SNAP25 etc.). In fact, *Drosophila* and human Syx16 share more than 60% amino-acid identity along this domain, although the overall identity is approximately 35%.

dSyx16 interacts with SNAP and NSF

Two independent approaches were undertaken to test whether *dSyx16* indeed functions as a SNARE. A biochemical approach was first used to examine whether *dSyx16* and *dSNAP* interact in vitro. Recombinant GST-*dSyx16* fusion protein was attached to glutathione beads and then incubated with purified *dSNAP*. Following extensive washes, proteins on the beads were eluted and subjected to western blot analysis. As shown in Fig. 2, GST-*dSyx16* binds to *dSNAP* in a concentration-dependent fashion, although an equivalent amount of GST retains no *dSNAP*. Hence, recombinant *dSNAP* binds directly to *dSyx16*.

A second approach to examine the role of *dSyx16* involved a genetic approach in vivo. Each unique SNARE complex would at one stage be disassembled by the actions of SNAP

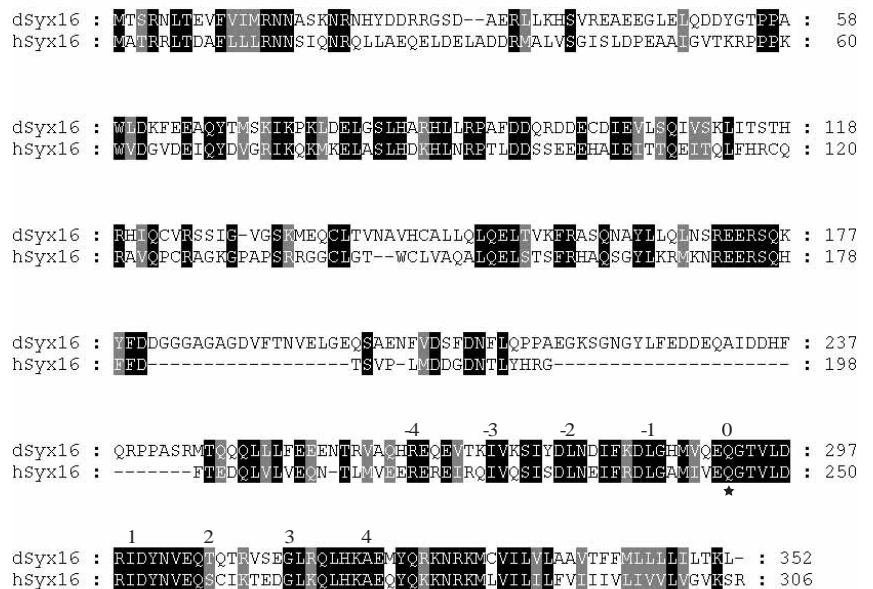

Fig. 1. Alignment of *dSyx16* with *hSyx16*. The sequences are numbered on the right. Identical amino acids are shaded black. Conserved amino acids are shaded gray. A potential transmembrane domain at the C-terminal end is underlined. The star below the residue Q indicates the central residue of the predicted coiled-coil. The heptad repeats are numbered above the sequence.

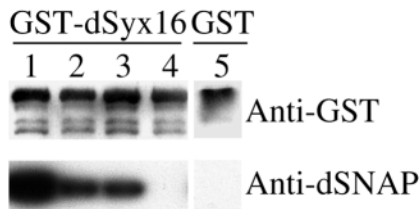

**Fig. 2.** dSyx16 binds dSNAP in a concentration-dependent fashion. From lane 1 to 5, immobilized GST-dSyx16 or GST were incubated with 10, 4, 2, 0 and 10  $\mu$ g of recombinant dSNAP, respectively. Proteins on the glutathione beads were then eluted and subjected to SDS-PAGE and western blot analysis.

and NSF so that freed SNAREs can participate in subsequent rounds of fusion events. Blocking NSF function would block the disassembly of the SNARE complexes and thereby interfere with membrane trafficking. For example, overexpression of a dominant-negative form of NSF at the wing margin resulted in a notch-wing phenotype in adult flies, presumably by inhibiting secretion/signalling during wing development [(Stewart et al., 2001); Fig. 3B].

To genetically address whether dSyx16 interacts with NSF, we took advantage of the observations that overexpression of a syntaxin (with or without its transmembrane motif) can specifically interfere with the membrane trafficking step this molecule is responsible for (Dascher and Balch, 1996; Hatsuzawa et al., 2000; Low et al., 1998; Mallard et al., 2002; Nagamatsu et al., 1996; Nakamura et al., 2000; Wu et al., 1998). Two dSyx16 transgenic flies bearing either amino acids 70 to 329 (UAS-dSyx16<sup>70 to 329</sup>) or 70 to 352 (UAS-dSyx16<sup>70 to 352</sup>) under the control of the GAL4 upstream activating sequence were created. Overexpression of the dSyx16 protein fragments in the wing margin was accomplished by crossing the UAS lines with C96-GAL4, which expresses GAL4 protein in the wing margin during wing development. As previously reported (Stewart et al., 2001), ectopic expression of the dominant-negative form of NSF2 under the control of C96-GAL4 gave rise to mild notches on the wing margin (compare Fig. 3B with 3A), which were enhanced by specific alleles of *dsyntaxin 1* (Stewart et al., 2001). Overexpression of the soluble dSyx16 (amino acid 70 to 329) did not appear to modify the notch-wing phenotype caused by dominant-negative NSF2 (compare Fig. 3C and 3B). However, overexpression of dSyx16<sup>70 to 352</sup> significantly enhanced the notch-wing phenotype (compare Fig. 3D and 3B). Since the two isoforms were expressed at a similar level (both isoforms can be distinguished from the wild-type on western blot; data not shown), it is unlikely that the expression levels are responsible for the differential effect on wing margin development. One conceivable explanation is that unlike dSyx16<sup>70 to 329</sup>, which is dispersed in the cytosol, dSyx16<sup>70 to 352</sup> is delivered to its designated location where its overexpression may sequester other molecules needed for fusion. Interestingly, overexpression of dSyx16<sup>70 to 352</sup> by itself does not lead to any noticeable defects in the wing margin or elsewhere (data not shown), indicating that

the dominant-negative effect derived from GAL4-driven overexpression of dSyx16 is not as prominent as that of NSF2. Nevertheless, both biochemical and genetic studies argue that the dSyx16 is a functional component of the SNARE complex.

#### Temporal and spatial localization of dSyx16

To determine the temporal distribution of dSyx16, embryos from *Oregon R* were collected every three hours after embryo deposition (AED) and allowed to develop for up to 24 hours. Embryos were then lysed and equal amounts of total protein were separated by SDS-PAGE and then immunoblotted with affinity-purified anti-dSyx16, which was raised in rabbits against His-dSyx16<sup>70 to 329</sup>. This antibody recognized a 44 kDa band from fly lysates, slightly above the predicted molecular mass of the polypeptide (40 kDa). The band disappeared if the antibody was pre-incubated with recombinant dSyx16 (data not shown), indicating that the antibody is specific. Using this antibody, we were able to detect a similar level of dSyx16 in all embryonic collections (Fig. 4A), suggesting a role for dSyx16 during embryogenesis. To examine the distribution of dSyx16 in late developmental stages, third instar larvae, pupae, adults and imaginal discs were collected and subjected to western blot analysis. As shown in Fig. 4B, dSyx16 was expressed at all stages examined and appeared to be more abundant in the adult head than the adult body. In addition, dSyx16 was abundantly expressed in imaginal discs and other tissues including CNS and salivary gland, where active membrane trafficking is required during development. That

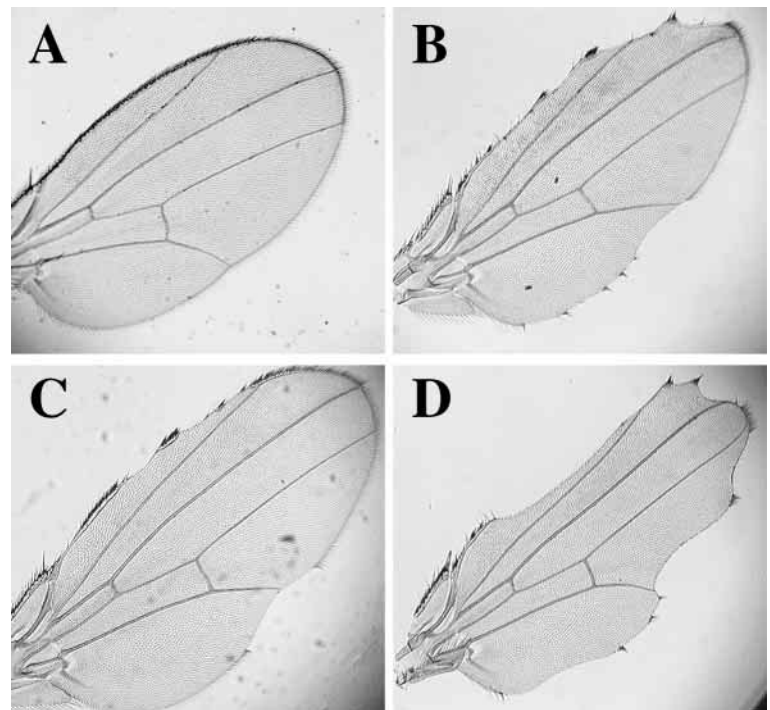

**Fig. 3.** dSyx16 interacts genetically with NSF2 during wing margin development. Wings from wild-type fly (A) and flies overexpressing dominant-negative NSF2 alone (B) or together with soluble dSyx16<sup>70 to 329</sup> (C) or together with dSyx16<sup>70 to 352</sup> (D) are shown. Several independent transgenic lines inserted with either the soluble dSyx16 or dSyx16<sup>70 to 352</sup> were tested and the phenotypes shown in C and D have been consistently observed.

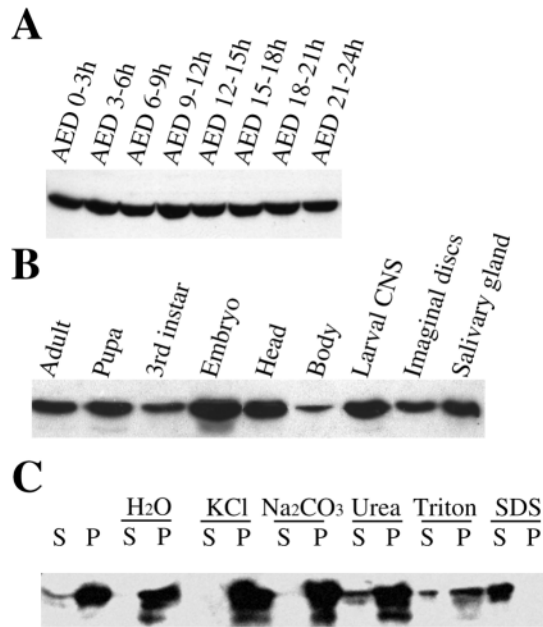

**Fig. 4.** dSyx16 is a membrane protein expressed ubiquitously in *Drosophila*. Embryos after deposition (AED) were collected and allowed to develop for indicated period of time (A). Larvae, pupae, adults were collected and imaginal discs were dissected from third instar larvae (B). All samples were lysed in SDS-homogenization buffer and subject to SDS-PAGE and western blot analysis. In C, crude membrane fraction from homogenized *Oregon R* adults was treated with H<sub>2</sub>O, KCl, Na<sub>2</sub>CO<sub>3</sub>, Urea, Triton X-100 or SDS and then centrifuged to separate the soluble from the insoluble. All samples were re-suspended to the same volume before subjecting them to SDS-PAGE and western blot analysis.

fact that dSyx16 is ubiquitously expressed throughout the life cycle of *Drosophila* is consistent with its potential role as a Golgi SNARE, which has been suggested by studies on its mammalian homologue Syx16 (Simonsen et al., 1998; Tang et al., 1998).

Amino-acid sequence analysis (Fig. 1) indicates that dSyx16 may associate with membranes through its C-terminal hydrophobic domain. To confirm this, adult fly lysates were separated into soluble and membrane fractions by centrifugation. Subsequent SDS-PAGE and western blot analysis showed that although dSyx16 was predominant in the crude membrane fraction, a small portion was present in the soluble fraction (Fig. 4C). This is probably because of the fact that dSyx16 carries only two amino acids following the potential transmembrane domain. Proteins with similar secondary structure are likely to be deposited into the

cytoplasm upon synthesis, since their membrane insertion is not coupled to translation but requires alternative mechanisms (Kim et al., 1999). To further determine whether dSyx16 is an integral membrane protein, the membrane fraction was treated with KCl, Na<sub>2</sub>CO<sub>3</sub> (high pH), urea, Triton X-100 and SDS respectively. KCl and Na<sub>2</sub>CO<sub>3</sub> did not solubilize dSyx16, suggesting that dSyx16 does not bind loosely to the membrane through ionic or hydrophobic interaction (Fig. 4C). Urea, which disrupts hydrogen bonds, was able to extract a small fraction of dSyx16, a phenomenon also observed with human syntaxin 18 (Hatsuzawa et al., 2000). The fact that most dSyx16 remained urea-insoluble excludes hydrogen bonding as a significant force that associates dSyx16 with membrane. Meanwhile, like many mammalian syntaxins (Wong et al., 1998), dSyx16 was soluble in SDS and partially soluble with Triton X-100. Taken together, our data suggest that dSyx16 is probably an integral membrane protein and its partial insolubility in Triton X-100 suggests that it may associate with cytoskeletal elements (Beites et al., 1999).

We then went on to determine the subcellular localization of dSyx16 in salivary gland cells. We chose salivary glands because our developmental western (Fig. 4B) showed that dSyx16 was abundant in salivary gland cells, which are much larger than cells from other tissues. We observed a punctate intracellular staining pattern in duct cells (Fig. 5), as well as punctate staining amongst granules in secretory cells (data not shown). It is evident that in duct cells the distribution pattern of dSyx16 overlaps with that of p120, a widely used *Drosophila* Golgi marker, although from time to time, very small puncta were found to be positive for anti-dSyx16 but not anti-p120. It is not known whether these fine punctate structures are simply staining artefacts or specific to duct cells. Similarly, in cultured Schneider (S2) cells, the staining pattern of dSyx16 matches that of p120, although the two do not overlap completely (Fig. 6E). Because p120 colocalizes with  $\beta$ -cop (Stanley et al., 1997), a cis-Golgi protein that shuttles between cis-Golgi and ER, we speculate that dSyx16 may be localized to a compartment adjacent to the cis-Golgi.

Human syntaxin 16 has been reported to localize on either the cis-Golgi (Simonsen et al., 1998) or the trans-Golgi network (TGN) (Mallard et al., 2002). Very recently, a possible role for hSyx16 in early/recycling endosomes-to-TGN transport has been reported (Mallard et al., 2002). In an attempt to further clarify the localization of dSyx16, we treated S2 cells with brefeldin A (BFA), a fungal metabolite that disrupts ER-to-Golgi trafficking. In mammalian systems, this drug causes Golgi markers to redistribute to the ER (Sciaky et al., 1997) and TGN markers to aggregate around the microtubule organization center. As shown in Fig. 6D, dSyx16 formed

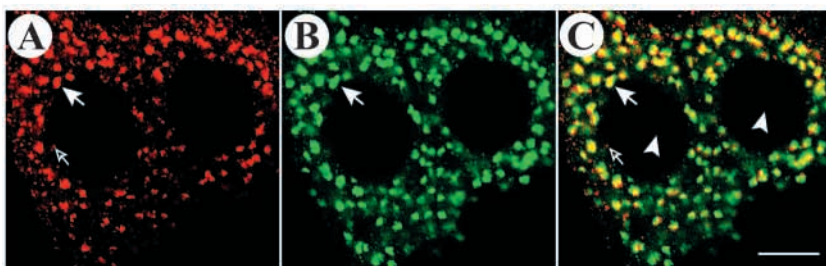

**Fig. 5.** dSyx16 distribution in salivary gland cells. Salivary glands were dissected from third instar larva, fixed in 4% paraformaldehyde and stained with anti-dSyx16 (A) and anti-p120 (B). The merged image is shown in C. Overlapping of large puncta is indicated by filled arrow. Open arrows point to a small punctate structure. Arrowheads indicate nuclei. Scale bar, 10  $\mu$ m.

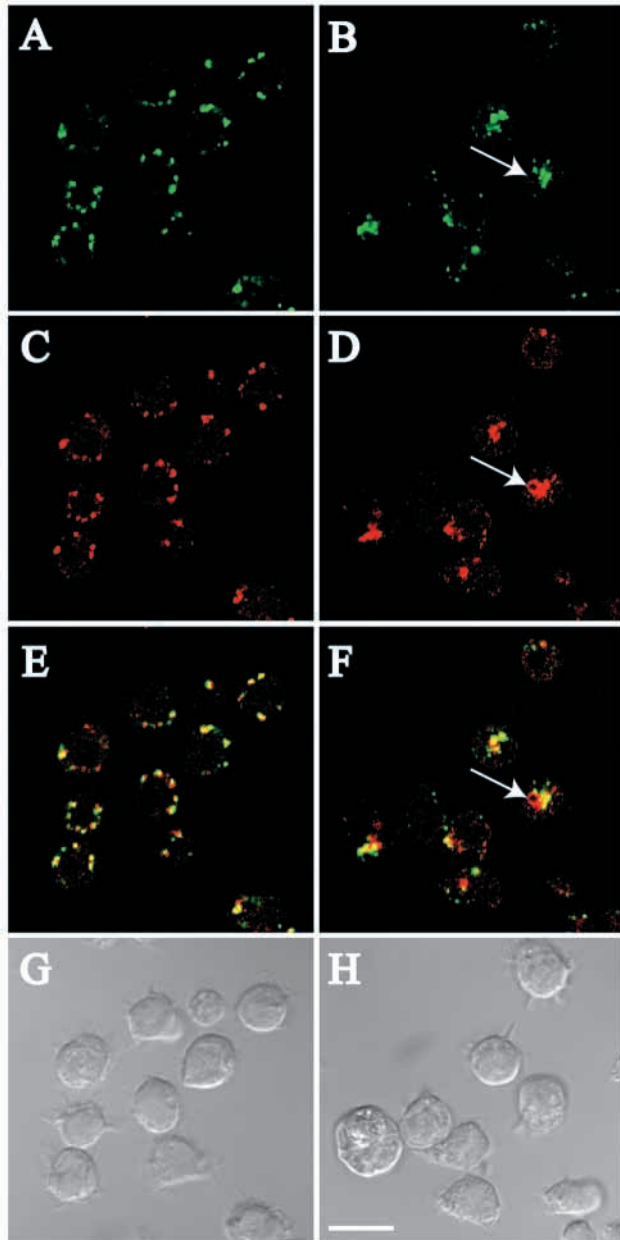

**Fig. 6.** dSyx16 localization in S2 cells. Cells treated with DMSO (A,C,E,G) or brefeldin A (B,D,F,H) were fixed and co-stained with antibodies against p120 (A,B) and dSyx16 (C,D). Note the small but distinct punctate Golgi pattern in the absence of BFA and the big aggregates with BFA treatment. Arrows point to the ring structure, which can be observed at different focal planes in other cells. Scale bar, 10  $\mu$ M.

aggregates that associated frequently with ring structures that only became evident upon BFA treatment (compare Fig. 6C with D). However, to our surprise, a similar effect on p120 was also observed (compare Fig. 6A with B). The two aggregates have distinct morphologies but maintain partial colocalization in most cells (Fig. 6F). Therefore, our data support the notion that dSyx16 is a Golgi SNARE localized in a cisterna adjacent to cis-Golgi that may be the counterpart of the TGN in mammalian cells.

#### dSyx16 distribution during cell division

In mammalian cells, most Golgi proteins are absorbed into the ER during cell division so that they can be partitioned equally into two daughter cells along with the ER (Roth, 1999; Seemann et al., 2002; Zaal et al., 1999). This does not appear to be the case with yeast Golgi, which exists as discrete units throughout the cytoplasm (Preuss et al., 1992). In *Drosophila*, Golgi membranes do not undergo morphological changes during early embryogenesis, although dispersion during mitotic division has been reported in tissue culture cells (Stanley et al., 1997). To investigate how dSyx16-containing membrane behaves during rapid cell division, we examined the distribution of dSyx16 in *Oregon R* testes, which are enriched with germ line cells at different stages of meiosis. In interphase cells (Fig. 7), anti-dSyx16 highlighted distinctive puncta, whereas anti-p120 frequently decorated ring structures. The two different structures match well, further supporting previous observations that dSyx16 and p120 are localized to two different but adjacent (or even connected) organelles. During anaphase, dSyx16 distribution became much more dispersed, suggesting that the dSyx16-containing membrane is either vesiculated or redistributed into the ER. Our results are consistent with the notion that in *Drosophila* the mechanism of Golgi inheritance is cell-type specific. It is still unclear why multiple Golgi partitioning strategies were developed in fruitfly but not other animals.

#### Overexpression of dSyx16 affects Golgi dynamics

To study the role(s) of dSyx16, we chose to use the overexpression approach. As mentioned earlier, overexpression of a syntaxin may inhibit the specific membrane fusion step this syntaxin is assigned to without interfering with other trafficking events. Studies on yeast (Banfield et al., 1994), fruitfly (Wu et al., 1998) and cultured mammalian cells (Dascher and Balch, 1996; Hatsuzawa et al., 2000; Low et al., 1998; Mallard et al., 2002; Nakamura et al., 2000) have demonstrated that the inhibitory effect can be obtained with either the wild-type or the cytosolic form. However, we did not observe any significant phenotype when we ectopically expressed dSyx16 in a variety of *Drosophila* tissues. This is probably due to the relatively low overexpression level permitted by the UAS-GAL4 system. Therefore, we went on to transiently express dSyx16 in cultured S2 cells. By placing *dSyx16* under the control of the metallothionein promoter, we expected to see a significant increase in dSyx16 level upon copper induction. Three different forms of dSyx16 were used to transfect S2 cells, full-length dSyx16<sup>1 to 352</sup>, dSyx16<sup>70 to 329</sup> and dSyx16<sup>70 to 352</sup>. After transfection, cells were induced overnight with 1 mM CuSO<sub>4</sub> before they were fixed and then stained with anti-myc (to detect transfected cells), anti-p120 or anti-lava. In cells with relatively low expression levels, myc-dSyx16 maintained partial colocalization with p120 in the Golgi (data not shown). Overexpression of either dSyx16 or dSyx16<sup>70 to 352</sup> caused the dispersal of p120 in more than 60% of the cells, whereas overexpression of the soluble form had no apparent effect on the Golgi marker (Fig. 8C,F). This suggests that the first 69 amino-acid residues have little to do with the negative effect caused by overexpression and that the transmembrane domain is important for the phenotype. We also noticed that when dSyx16<sup>70 to 352</sup> was overexpressed, it was

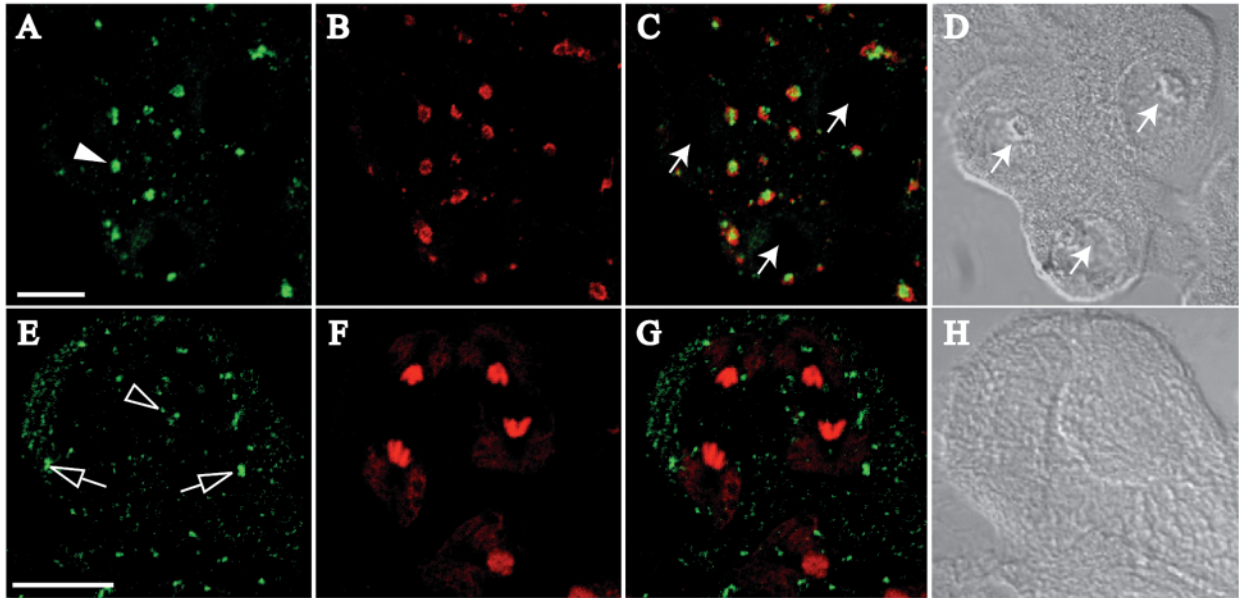

**Fig. 7.** dSyx16 distribution during cell division in *Drosophila* testis. Testes from *Oregon R* were dissected and stained with anti-dSyx16 (A,E), anti-p120 (B) or propidium iodide (F). A-D are interphase cells with intact nuclei arrows. dSyx16 is localized in distinct puncta (arrowhead). E-H are anaphase cells with dSyx16 much more dispersed (open arrowhead). Occasionally, larger puncta can be observed (open arrows), but they are not comparable with those in interphase cells. Scale bars, 10  $\mu$ M.

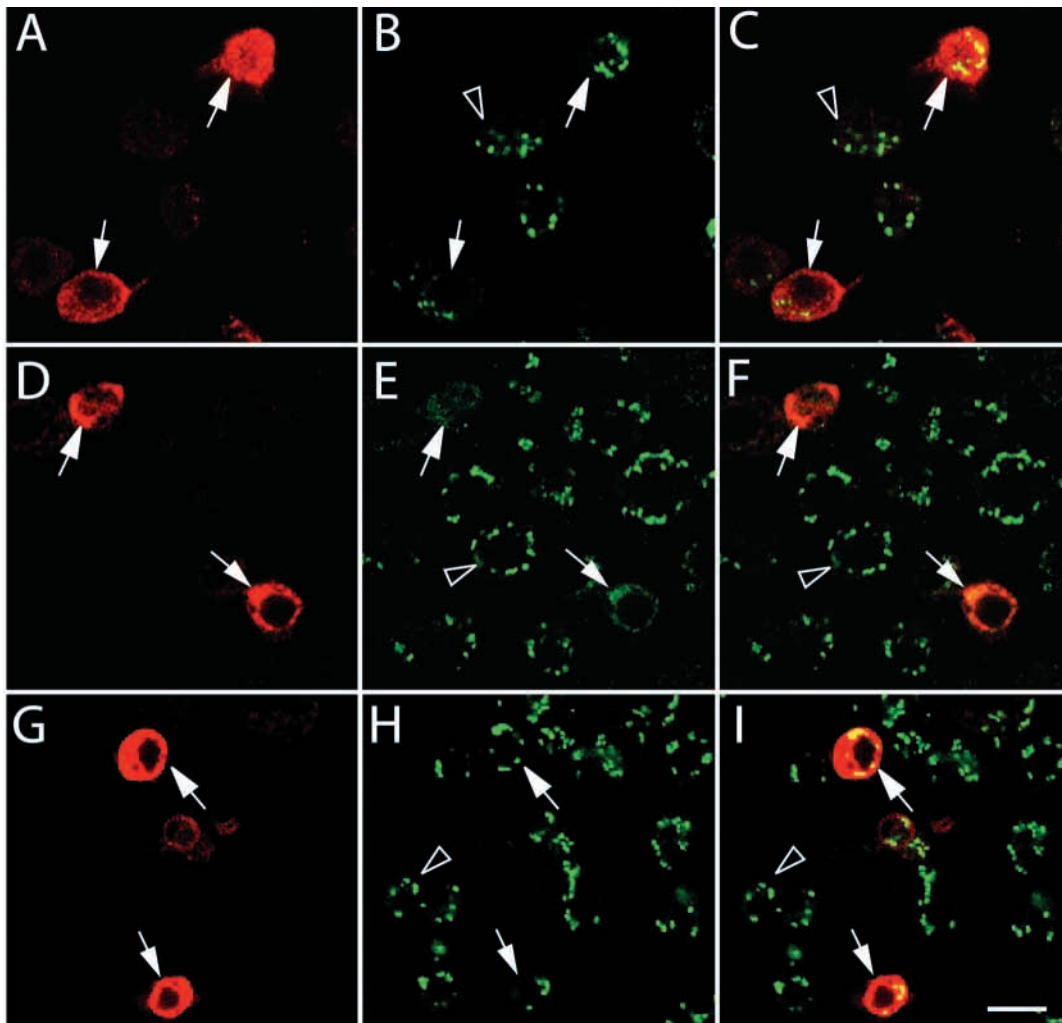

**Fig. 8.** Overexpression of dSyx16 in S2 cells. S2 cells transfected with myc-dSyx16<sup>70 to 329</sup> (A-C) or myc-dSyx16<sup>70 to 352</sup> (D-I) were fixed and co-stained with anti-myc (red channel) and anti-p120 (green channel, B,C,E,F) or anti-Iva (green channel, H,I) antibodies. The arrows point to transfected cells. Open arrowheads point to non-transfected cells. Scale bar, 10  $\mu$ M.

no longer localized in large peri-nuclear puncta. Instead, it was dispersed in numerous fine punctate structures throughout the cytoplasm. Interestingly, although overexpressing dSyx16<sup>70 to 352</sup> might affect the localization of the Golgi marker p120 or even itself, it did not appear to affect the distribution of lava-lamp (Fig. 8I), another protein known to be localized to the Golgi (Sisson et al., 2000). Two possible scenarios could account for this observation. First, the Golgi apparatus may still be intact upon dSyx16 overexpression. Thus, the overexpression experiments did not simply disrupt the entire secretory pathway but rather had an inhibitory effect on the dynamics of specific Golgi proteins such as p120. However, since lava-lamp is a peripheral membrane protein associated with microtubules, we cannot rule out the possibility that anti-lva could decorate Golgi remnants even after Golgi membranes had been recycled. Future studies will be aimed at addressing these issues.

In yeast and mammals, syntaxin 5 has been shown to function in ER-to-Golgi trafficking. In mammals, syntaxin 16 and syntaxin 6 are thought to be localized to the late Golgi compartments and have recently been shown to receive retrograde transport from the endosomes. Our overexpression studies provided evidence that *Drosophila* syntaxin16 is likely to be involved in Golgi dynamics but have not precisely defined the role of this protein, because blocking traffic at either side of the Golgi can potentially disturb the distribution of Golgi proteins. Future work is warranted to address this issue as well as the functional relationship between dSyx16 and its partners.

The authors thank Joe Verdi, John Sisson, and David Williams for kindly providing *Drosophila* ovary cDNA library, anti-lva antiserum, and pRmHa-3 expression vector respectively. Lily Zhou's technical assistance on microinjection was greatly appreciated. These studies were supported by grants from the Canadian Institutes of Health Research (G.L.B., W.S.T.) and the National Cancer Institute of Canada (W.S.T.). H.X. is the recipient of a CIHR Studentship. G.L.B. and W.S.T. are CIHR Investigators.

## References

- Adams, M. D., Celniker, S. E., Holt, R. A., Evans, C. A., Gocayne, J. D., Amanatides, P. G., Scherer, S. E., Li, P. W., Hoskins, R. A., Galle, R. F. et al. (2000). The genome sequence of *Drosophila melanogaster*. *Science* **287**, 2185-2195.
- Antonin, W., Fasshauer, D., Becker, S., Jahn, R. and Schneider, T. R. (2002). Crystal structure of the endosomal SNARE complex reveals common structural principles of all SNAREs. *Nat. Struct. Biol.* **9**, 107-111.
- Banfield, D. K., Lewis, M. J., Rabouille, C., Warren, G. and Pelham, H. R. (1994). Localization of Sed5, a putative vesicle targeting molecule, to the cis-Golgi network involves both its transmembrane and cytoplasmic domains. *J. Cell Biol.* **127**, 357-371.
- Bannykh, S. I., Nishimura, N. and Balch, W. E. (1998). Getting into the Golgi. *Trends Cell Biol.* **8**, 21-25.
- Beites, C. L., Xie, H., Bowser, R. and Trimble, W. S. (1999). The septin CDCrel-1 binds syntaxin and inhibits exocytosis. *Nat. Neurosci.* **2**, 434-439.
- Bloom, G. S. and Goldstein, L. S. (1998). Cruising along microtubule highways: how membranes move through the secretory pathway. *J. Cell Biol.* **140**, 1277-1280.
- Brand, A. H. and Perrimon, N. (1993). Targeted gene expression as a means of altering cell fates and generating dominant phenotypes. *Development* **118**, 401-415.
- Chen, Y. A. and Scheller, R. H. (2001). SNARE-mediated membrane fusion. *Nat. Rev. Mol. Cell Biol.* **2**, 98-106.
- Dascher, C. and Balch, W. E. (1996). Mammalian Sly1 regulates syntaxin 5 function in endoplasmic reticulum to Golgi transport. *J. Biol. Chem.* **271**, 15866-15869.
- Fasshauer, D., Sutton, R. B., Brunger, A. T. and Jahn, R. (1998). Conserved structural features of the synaptic fusion complex: SNARE proteins reclassified as Q- and R-SNAREs. *Proc. Natl. Acad. Sci. USA* **95**, 15781-15786.
- Fukuda, R., McNew, J. A., Weber, T., Parlati, F., Engel, T., Nickel, W., Rothman, J. E. and Sollner, T. H. (2000). Functional architecture of an intracellular membrane t-SNARE. *Nature* **407**, 198-202.
- Hatsuzawa, K., Hirose, H., Tani, K., Yamamoto, A., Scheller, R. H. and Tagaya, M. (2000). Syntaxin 18, a SNAP receptor that functions in the endoplasmic reticulum, intermediate compartment, and cis-Golgi vesicle trafficking. *J. Biol. Chem.* **275**, 13713-13720.
- Hime, G. R., Brill, J. A. and Fuller, M. T. (1996). Assembly of ring canals in the male germ line from structural components of the contractile ring. *J. Cell Sci.* **109**, 2779-2788.
- Hughson, F. M. (1999). Membrane fusion: structure snared at last. *Curr. Biol.* **9**, R49-R52.
- Jahn, R. and Sudhof, T. C. (1999). Membrane fusion and exocytosis. *Annu. Rev. Biochem.* **68**, 863-911.
- Kim, P. K., Hollerbach, C., Trimble, W. S., Leber, B. and Andrews, D. W. (1999). Identification of the endoplasmic reticulum targeting signal in vesicle-associated membrane proteins. *J. Biol. Chem.* **274**, 36876-36882.
- Lindsley, D. and Zimm, G. G. (1992). *The Genome of Drosophila melanogaster*. San Diego: Academic Press.
- Low, S. H., Chapin, S. J., Wimmer, C., Whiteheart, S. W., Komuves, L. G., Mostov, K. E. and Weimbs, T. (1998). The SNARE machinery is involved in apical plasma membrane trafficking in MDCK cells. *J. Cell Biol.* **141**, 1503-1513.
- Mallard, F., Tang, B. L., Galli, T., Tenza, D., Saint-Pol, A., Yue, X., Antony, C., Hong, W., Goud, B. and Johannes, L. (2002). Early/recycling endosomes-to-TGN transport involves two SNARE complexes and a Rab6 isoform. *J. Cell Biol.* **156**, 653-664.
- Mayer, A. (1999). Intracellular membrane fusion: SNAREs only? *Curr. Opin. Cell Biol.* **11**, 447-452.
- Mayer, A. (2001). What drives membrane fusion in eukaryotes? *Trends Biochem. Sci.* **26**, 717-723.
- Mohtashami, M., Stewart, B. A., Boulianne, G. L. and Trimble, W. S. (2001). Analysis of the mutant *Drosophila* N-ethylmaleimide sensitive fusion-1 protein in comatose reveals molecular correlates of the behavioural paralysis. *J. Neurochem.* **77**, 1407-1417.
- Nagamatsu, S., Fujiwara, T., Nakamichi, Y., Watanabe, T., Katahira, H., Sawa, H. and Akagawa, K. (1996). Expression and functional role of syntaxin 1/HPC-1 in pancreatic beta cells. Syntaxin 1A, but not 1B, plays a negative role in regulatory insulin release pathway. *J. Biol. Chem.* **271**, 1160-1165.
- Nakamura, N., Yamamoto, A., Wada, Y. and Futai, M. (2000). Syntaxin 7 mediates endocytic trafficking to late endosomes. *J. Biol. Chem.* **275**, 6523-6529.
- Otto, H., Hanson, P. I. and Jahn, R. (1997). Assembly and disassembly of a ternary complex of synaptobrevin, syntaxin, and SNAP-25 in the membrane of synaptic vesicles. *Proc. Natl. Acad. Sci. USA* **94**, 6197-6201.
- Pelham, H. R. (1999). The Croonian Lecture 1999. Intracellular membrane traffic: getting proteins sorted. *Philos. Trans. R. Soc. Lond. B Biol. Sci.* **354**, 1471-1478.
- Pelham, H. R. (2001). SNAREs and the specificity of membrane fusion. *Trends Cell Biol.* **11**, 99-101.
- Peters, C. and Mayer, A. (1998). Ca<sup>2+</sup>/calmodulin signals the completion of docking and triggers a late step of vacuole fusion. *Nature* **396**, 575-580.
- Peters, C., Andrews, P. D., Stark, M. J., Cesaro-Tadic, S., Glatz, A., Podtelejnikov, A., Mann, M. and Mayer, A. (1999). Control of the terminal step of intracellular membrane fusion by protein phosphatase 1. *Science* **285**, 1084-1087.
- Preuss, D., Mulholland, J., Franzusoff, A., Segev, N. and Botstein, D. (1992). Characterization of the *Saccharomyces* Golgi complex through the cell cycle by immunoelectron microscopy. *Mol. Biol. Cell* **3**, 789-803.
- Roth, M. G. (1999). Inheriting the Golgi. *Cell* **99**, 559-562.
- Rothman, J. E. (1994). Intracellular membrane fusion. *Adv. Second Messenger Phosphoprotein Res.* **29**, 81-96.
- Rothman, J. E. and Warren, G. (1994). Implications of the SNARE hypothesis for intracellular membrane topology and dynamics. *Curr. Biol.* **4**, 220-233.
- Rothman, J. E. and Wieland, F. T. (1996). Protein sorting by transport vesicles. *Science* **272**, 227-234.



- Rubin, G. M. and Spradling, A. C. (1982). Genetic transformation of *Drosophila* with transposable element vectors. *Science* **218**, 348-353.
- Sciaky, N., Presley, J., Smith, C., Zaal, K. J., Cole, N., Moreira, J. E., Terasaki, M., Siggia, E. and Lippincott-Schwartz, J. (1997). Golgi tubule traffic and the effects of brefeldin A visualized in living cells. *J. Cell Biol.* **139**, 1137-1155.
- Seemann, J., Pypaert, M., Taguchi, T., Malsam, J. and Warren, G. (2002). Partitioning of the matrix fraction of the Golgi apparatus during mitosis in animal cells. *Science* **295**, 848-851.
- Simonsen, A., Bremnes, B., Ronning, E., Aasland, R. and Stenmark, H. (1998). Syntaxin-16, a putative Golgi t-SNARE. *Eur. J. Cell Biol.* **75**, 223-231.
- Sisson, J. C., Field, C., Ventura, R., Royou, A. and Sullivan, W. (2000). Lava lamp, a novel peripheral golgi protein, is required for *Drosophila melanogaster* cellularization. *J. Cell Biol.* **151**, 905-918.
- Stanley, H., Botas, J. and Malhotra, V. (1997). The mechanism of Golgi segregation during mitosis is cell type-specific. *Proc. Natl. Acad. Sci. USA* **94**, 14467-14470.
- Stewart, B. A., Mohtashami, M., Zhou, L., Trimble, W. S. and Boulianne, G. L. (2001). SNARE-dependent signaling at the *Drosophila* wing margin. *Dev. Biol.* **234**, 13-23.
- Sutton, R. B., Fasshauer, D., Jahn, R. and Brunger, A. T. (1998). Crystal structure of a SNARE complex involved in synaptic exocytosis at 2.4 Å resolution. *Nature* **395**, 347-353.
- Tang, B. L., Low, D. Y., Lee, S. S., Tan, A. E. and Hong, W. (1998). Molecular cloning and localization of human syntaxin 16, a member of the syntaxin family of SNARE proteins. *Biochem. Biophys. Res. Commun.* **242**, 673-679.
- Tsui, M. M. and Banfield, D. K. (2000). Yeast Golgi SNARE interactions are promiscuous. *J. Cell Sci.* **113**, 145-152.
- Weber, T., Zemelman, B. V., McNew, J. A., Westermann, B., Gmachl, M., Parlati, F., Sollner, T. H. and Rothman, J. E. (1998). SNAREpins: minimal machinery for membrane fusion. *Cell* **92**, 759-772.
- Weimbs, T., Low, S. H., Chapin, S. J., Mostov, K. E., Bucher, P. and Hofmann, K. (1997). A conserved domain is present in different families of vesicular fusion proteins: a new superfamily. *Proc. Natl. Acad. Sci. USA* **94**, 3046-3051.
- Wong, S. H., Xu, Y., Zhang, T. and Hong, W. (1998). Syntaxin 7, a novel syntaxin member associated with the early endosomal compartment. *J. Biol. Chem.* **273**, 375-380.
- Wu, M. N., Littleton, J. T., Bhat, M. A., Prokop, A. and Bellen, H. J. (1998). ROP, the *Drosophila* Sec1 homolog, interacts with syntaxin and regulates neurotransmitter release in a dosage-dependent manner. *EMBO J.* **17**, 127-139.
- Yang, B., Gonzalez, L., Jr, Prekeris, R., Steegmaier, M., Advani, R. J. and Scheller, R. H. (1999). SNARE interactions are not selective. Implications for membrane fusion specificity. *J. Biol. Chem.* **274**, 5649-5653.
- Zaal, K. J., Smith, C. L., Polishchuk, R. S., Altan, N., Cole, N. B., Ellenberg, J., Hirschberg, K., Presley, J. F., Roberts, T. H., Siggia, E. et al. (1999). Golgi membranes are absorbed into and re-emerge from the ER during mitosis. *Cell* **99**, 589-601.
